# Supplementary material for: High-performance and self-powered visible light photodetector using multiple coupled synergetic effects
Source: Royal Society of Chemistry journal article supplement (doi:10.1039/d3mh01725g), 2023-11-22
Supplement: d3mh01725g1.pdf [file d3mh01725g1.pdf]

## High-Performance and Self-Powered Visible Light Photodetector using Multiple Coupled Synergetic Effects

José P. B. Silva<sup>1,2,δ\*</sup>, Eliana M. F. Vieira<sup>3,4,δ</sup>, Katarzyna Gwozdz<sup>5</sup>, Nuno E. Silva<sup>1,2</sup>, Adrian Kaim<sup>5</sup>, Marian C. Istrate<sup>6,7</sup>, Corneliu Ghica<sup>6</sup>, José H. Correia<sup>3,4</sup>, Mario Pereira<sup>1,2</sup>, Luís Marques<sup>1,2</sup>, Judith L. MacManus-Driscoll<sup>8\*</sup>, Robert L. Z. Hoye<sup>9</sup>, Maria J. M. Gomes<sup>1,2</sup>

<sup>1</sup>Physics Center of Minho and Porto Universities (CF-UM-UP), University of Minho, Campus de Gualtar, 4710-057 Braga, Portugal

<sup>2</sup>Laboratory of Physics for Materials and Emergent Technologies, LapMET, University of Minho, 4710-057 Braga, Portugal

<sup>3</sup>CMEMS – UMinho, University of Minho, Campus de Azurem, 4804-533 Guimarães, Portugal

<sup>4</sup>LABELS –Associate Laboratory, Braga, Guimarães, Portugal

<sup>5</sup>Department of Quantum Technologies, Wrocław University of Science and Technology, Wrocław 50-370, Poland

<sup>6</sup>National Institute of Materials Physics, 105 bis Atomistilor, 077125 Magurele, Romania

<sup>7</sup>University of Bucharest, Faculty of Physics, Atomistilor 405, Magurele Ilfov 077125, Romania

<sup>8</sup>Dept. of Materials Science and Metallurgy, University of Cambridge, 27 Charles Babbage Rd., Cambridge, CB3 0FS, U.K.

<sup>9</sup>Inorganic Chemistry Laboratory, Department of Chemistry, University of Oxford, South Parks Road, Oxford, OX1 3QR, UK

<sup>δ</sup>These authors contributed equally to this work.

\* Corresponding authors' e-mails: [josesilva@fisica.uminho.pt](mailto:josesilva@fisica.uminho.pt) and [jld35@cam.ac.uk](mailto:jld35@cam.ac.uk)

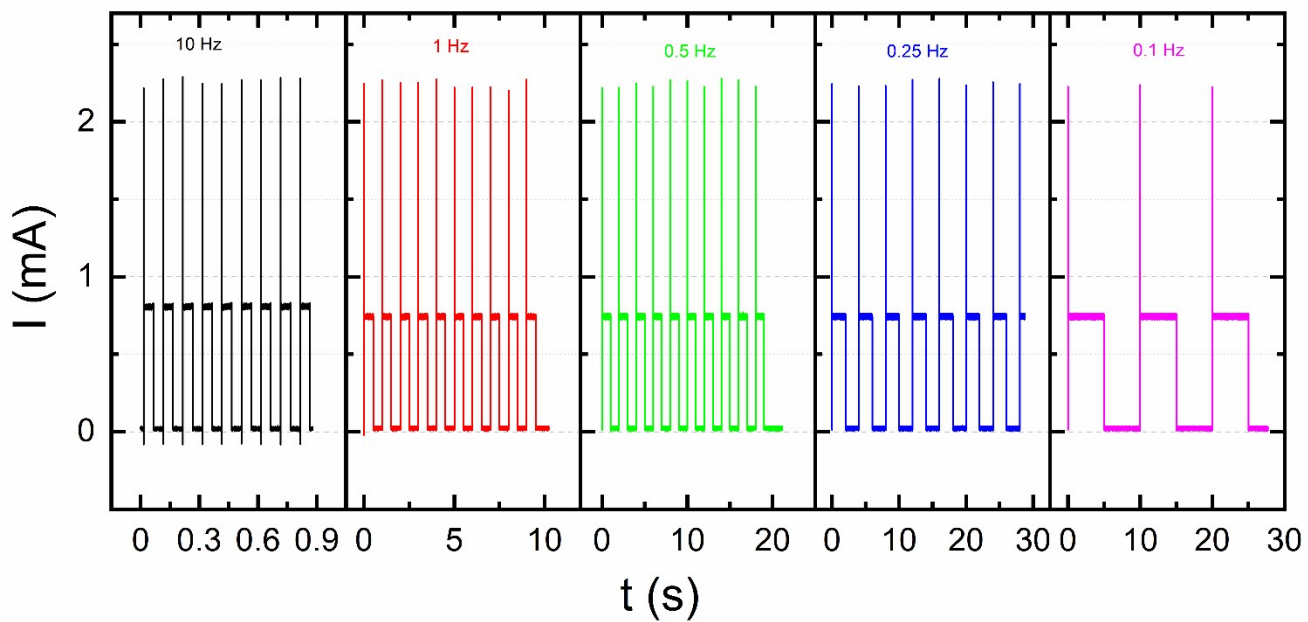

**Fig. S1.**  $I$ - $t$  curves for the Ag@20 sample at different chopper frequency, in the range 10-0.1 Hz, for a fixed power density of 877 mW/cm<sup>2</sup>.

**Table S1.** Dark current and photocurrent values obtained through  $I$ - $V$  and  $I$ - $t$  measurements, respectively for the different samples.

| <b>Sample</b> | <b>Dark current (nA)</b> | <b>Photocurrent (mA)</b> |
|---------------|--------------------------|--------------------------|
| Ag@0          | 270                      | 0.47                     |
| Ag@10         | 32.4                     | 1.45                     |
| Ag@20         | 7.6                      | 1.99                     |
| Ag@40         | 27.7                     | 3.77                     |
| Ag@80         | 73.7                     | 1.43                     |
| Ag@160        | 5.6                      | 1.56                     |
